# Supplementary material for: A 3D in vitro model of the human breast duct: a method to unravel myoepithelial-luminal interactions in the progression of breast cancer
Source: PubMed Central journal article supplement (PMC5399380; doi:10.1186/s13058-017-0843-4), 2017-04-21

**Supplementary Figure 1. Promoter efficacy in primary cultures of myoepithelial and luminal cells.** **A)** Representative images of GFP expression in myoepithelial and luminal cells 48 hours following infection with neuraminidase-treated lentiviral particles driving GFP expression under either human/mouse *CMV*, human/mouse *EF1 $\alpha$* , *CAG*, *PGK* and *UBC* promoters. Scale bar = 20  $\mu\text{m}$ . **B)** Mean fluorescence intensity (MFI) values of myoepithelial and luminal cells 48 hours post infection with lentiviral particles as in **A**. Images and values representative of cells derived from two donors.

**Supplementary Figure 2. Spheroids formed in Matrigel cultures express markers of both luminal and myoepithelial cells.** Expression of Cytokeratin (CK) 8 and P-Cadherin in spheroids formed in Matrigel from co-culture of isolated myoepithelial and luminal cells over 21 days. Images representative of cells derived from at least three donors. Scale bar = 20  $\mu\text{m}$ .

**Supplementary Figure 3. Objective and systematic calculation of cell and spheroid volumes.** Representative workflow of spheroid analysis. Raw DAPI z-sections (**A**) are converted into grey-scale images and a grey-scale distribution profile (**B**). Grey-scale images are then converted to binary images using a calculated threshold to indicate cell presence (**C**). The pixels that indicate cells are then translated into a geometrically accurate point-cloud using the known image resolutions (**D**). Further post-processing using Density-Based Spatial Clustering of Applications with Noise (DBSCAN) is performed to identify the main body of cells (**E**). The point cloud representing the main spheroid is then extracted (**F**). The Alpha Shape algorithm is applied using thresholds set as a function of the image resolutions to form triangulated bodies that represent the cells and body (**G**). The volumes of these bodies are then calculated alongside the resultant cell/body ratio.

Figure S1

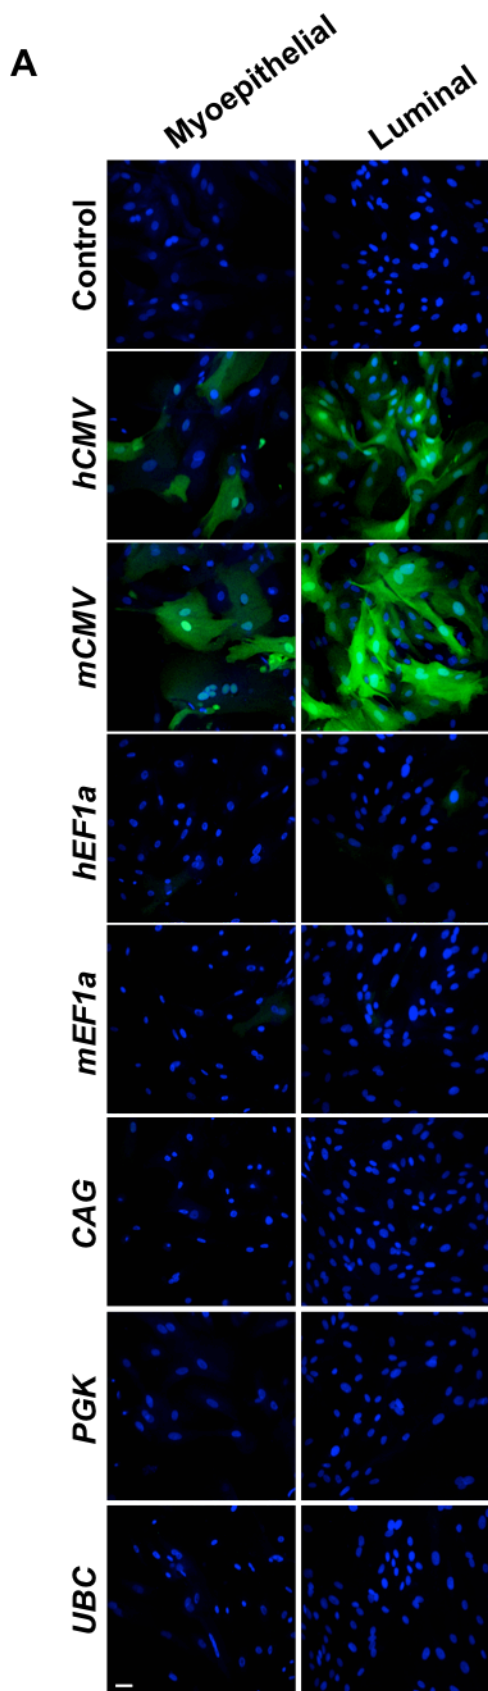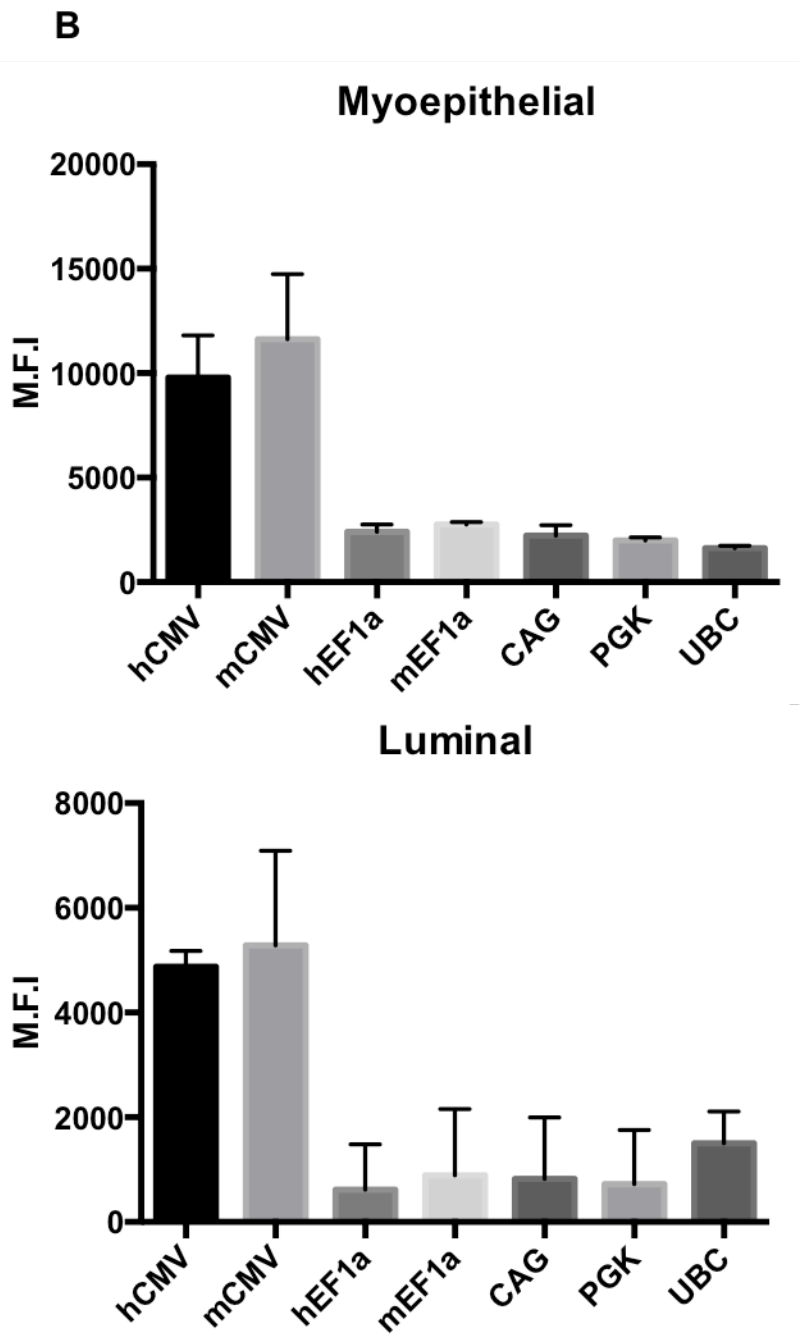

**Figure S2**

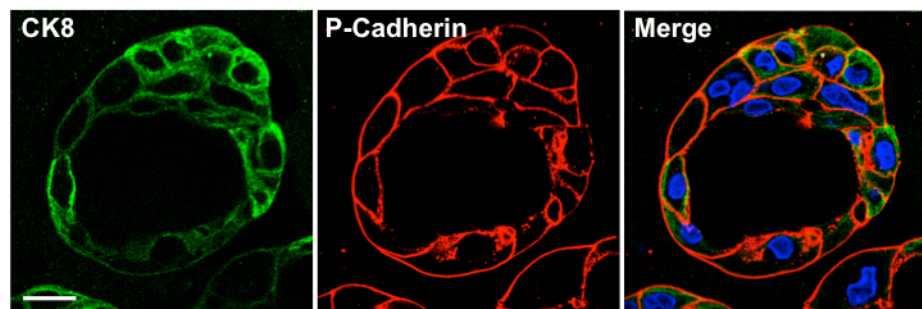

**Figure S3**

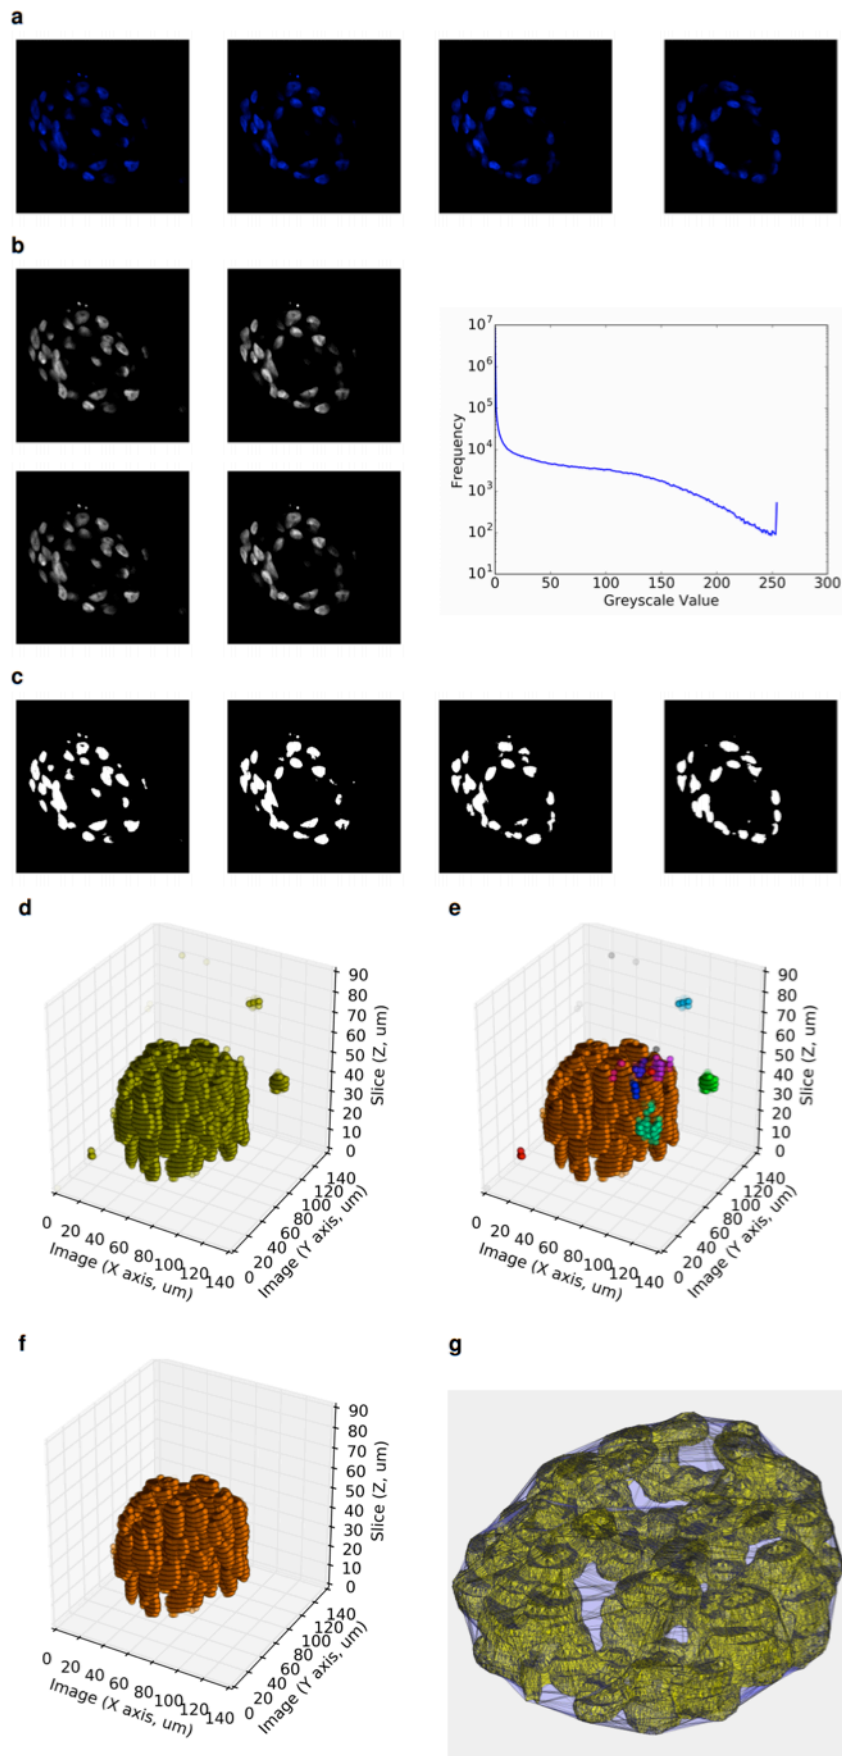

Supplement: 13058_2017_843_MOESM1_ESM.pdf [file 13058_2017_843_MOESM1_ESM.pdf]
